# Supplementary material for: Evaluation of the efficacy and safety of fermented red ginseng product (FRGP) for improving blood sugar and blood cholesterol: 12 week, multicenter, randomized, double-blind, placebo-controlled clinical trial
Source: Research Square preprint supplement (doi:10.21203/rs.3.rs-4141489/v1), 2024-03-26
Supplement: Supplementary file 1 [file 554c378c6fb85b3a98bb157d.docx]

Table1. Baseline characteristics of the subjects in the per protocol set

|  | **FRGP**  **N=30** | **Placebo**  **N=35** | **Total**  **N=65** | **P-value** |
| --- | --- | --- | --- | --- |
| **Sex n(%)** |  |  |  | 0.9684† |
| Male | 11(36.67) | 13(37.14) | 24(36.92) |  |
| Female | 19(63.33) | 22(62.86) | 41(63.08) |  |
| **Age** |  |  |  | 0.7758* |
| Mean±SD | 54.43±13.59 | 53.51±9.32 | 53.94±11.40 |  |
| Min, Max | 28.00, 75.00 | 29.00, 69.00 | 28.00, 75.00 |  |
| **Height(cm)** |  |  |  | 0.2769* |
| Mean±SD | 160.42±9.97 | 162.82±7.60 | 161.71±8.79 |  |
| Min, Max | 142.00, 178.70 | 149.00, 180.00 | 142.00, 180.00 |  |
| **BMI(kg/m2)** |  |  |  | 0.4865* |
| Mean±SD | 25.23±3.54 | 25.88±3.91 | 25.58±3.73 |  |
| Min, Max | 20.20, 38.86 | 20.26, 37.88 | 20.20, 38.86 |  |
| **Marital status** |  |  |  | 0.0329‡ |
| Unmarried | 6(20) | 1(2.86) | 7(10.77) |  |
| Married | 21(70) | 33(94.29) | 54(83.08) |  |
| Single | 0 (0.00) | 0 (0.00) | 0 (0.00) |  |
| Divorced/separation | 3(10.00) | 1.(2.86) | 4(6.15) |  |
| Widow | 0 (0.00) | 0 (0.00) | 0 (0.00) |  |
| **Smoking n(%)** |  |  |  | 0.8675‡ |
| Non-smoker | 25 (83.33) | 31 (88.57) | 56 (86.15) |  |
| Ex-smoker | 3 (10.00) | 2 (5.71) | 5 (7.69) |  |
| Smoker | 2(6.67) | 2 (5.71) | 4 (6.15) |  |
| **Smoking amount (Cigarette)** |  |  |  | 0.1679* |
| Mean±SD | 9.00±1.41 | 6.00±1.41 | 7.50±2.08 |  |
| Min, Max | 8.00, 10.00 | 5.00, 7.00 | 5.00, 10.00 |  |
| **Smoking perioid**  **(Year)** |  |  |  | 0.7643* |
| Mean±SD | 17.50±17.68 | 22.50±10.61 | 20.00±12.25 |  |
| Min, Max | 5.00, 30.00 | 15.00, 30.00 | 5.00, 30.00 |  |
| **Physical activity** |  |  |  | 0.5332† |
| No | 5 (16.67) | 9 (25.71) | 14 (21.54) |  |
| <3times/week or <30min/once | 12 (40.00) | 10 (28.57) | 22 (33.85) |  |
| ≥3time/week or ≥30min/once | 13 (43.33) | 16 (45.71) | 29 (44.62) |  |
| **High fat diet n(%)** |  |  |  | 0.0680‡ |
| No | 1 (3.33) | 8 (22.86) | 9 (13.85) |  |
| 1~2time/week | 22 (73.33) | 21 (60.00) | 43 (66.15) |  |
| ≥3time/week | 7 (23.33) | 6 (17.14) | 13 (20.00) |  |
| **Family Hx of Dyslipidemia**  **n(%)** |  |  |  | 0.8134† |
| No | 12 (40.00) | 13 (37.14) | 25 (38.46) |  |
| Yes | 18 (60.00) | 22 (62.86) | 40 (61.54) |  |
| **Family Hx of Diabetes melitus**  **n(%)** |  |  |  | 0.8700† |
| No | 10 (33.33) | 11 (31.43) | 21 (32.31) |  |
| Yes | 20 (66.67) | 24 (68.57) | 44 (67.69) |  |
| **Presence of comorbidity n(%)** |  |  |  | 0.5008† |
| No | 10(33.33) | 9(25.71) | 19(29.33) |  |
| Yes | 20(66.67) | 26(74.29) | 46(70.77) |  |
| **History of surgery n(%)** |  |  |  | 0.4615‡ |
| No | 29 (96.67) | 35 (100.00) | 64 (98.46) |  |
| Yes | 1 (3.33) | 0 (0.00) | 1 (1.54) |  |
| **Drug usage within 3mo n(%)** |  |  |  | 0.6428† |
| No | 12 (40.00) | 16 (45.71) | 28 (43.08) |  |
| Yes | 18 (60.00) | 19 (54.29) | 37 (56.92) |  |

*: P-value by Two sample t-test

†: P-value by Chi-square test

‡: P-value by Fisher’s exact test

Table2. Change of primary, secondary outcome at baseline, 6 weeks and 12 weeks (PP Set)

|  |  | **FRGP**  **N=30**  **Mean±SD** | **Placebo**  **N=35**  **Mean±SD** | **P-value*** | **P-value$** |
| --- | --- | --- | --- | --- | --- |
| **FBS**  **(mg/dl)** | Baseline(V2) | 108.60± 7.42 | 109.60± 7.39 | 0.5893 |  |
| 6 weeks(V3) | 104.53±9.39 | 105.51±11.19 | 0.9944 | 0.8012 |
| Change from baseline | -4.07±8.46 | -4.09±13.12 |  |  |
| P-value** | 0.0134 | 0.0743 |  |  |
| 12weeks(V4) | 102.50±11.08 | 105.74±9.70 | 0.4561 | 0.2380 |
| Change from baseline | -6.10±11.11 | -3.86±12.74 |  |  |
| P-value** | 0.0054 | 0.0823 |  |  |
| **Total -cholesterol**  **(mg/dl)** | Baseline(V2) | 228.27±17.51 | 229.94±22.27 | 0.7401 |  |
| 6 weeks(V3) | 221.33±24.71 | 224.54±30.05 | 0.7610 | 0.7481 |
| Change from baseline | -6.93±19.44 | -5.40±20.77 |  |  |
| P-value** | 0.0605 | 0.1334 |  |  |
| 12weeks(V4) | 212.60±25.38 | 223.66±35.87 | 0.1654 | 0.1534 |
| Change from baseline | -15.67±29.19 | -6.29±24.71 |  |  |
| P-value** | 0.0064 | 0.1416 |  |  |
| **LDL-cholesterol**  **(mg/dl)** | Baseline(V2) | 140.27±17.91 | 137.80±21.71 | 0.6227 |  |
| 6 weeks(V3) | 137.20±22.70 | 135.94±25.18 | 0.8230 | 0.9508 |
| Change from baseline | -3.07±20.44 | -1.86±22.62 |  |  |
| P-value** | 0.4178 | 0.6302 |  |  |
| 12weeks(V4) | 132.27±24.32 | 136.11±33.03 | 0.2777 | 0.2994 |
| Change from baseline | -8.00±25.26 | -1.69±21.25 |  |  |
| P-value** | 0.0934 | 0.6418 |  |  |
| **HDL-cholesterol**  **(mg/dl)** | Baseline(V2) | 59.87±12.39 | 58.80±14.79 | 0.7560 |  |
| 6 weeks(V3) | 60.63±12.31 | 60.03±15.27 | 0.8004 | 0.8538 |
| Change from baseline | 0.77±7.48 | 1.23±7.17 |  |  |
| P-value** | 0.5787 | 0.3176 |  |  |
| 12weeks(V4) | 58.43±9.63 | 58.46±15.19 | 0.5879 | 0.6647 |
| Change from baseline | -1.43±6.21 | -0.34±9.76 |  |  |
| P-value** | 0.2160 | 0.8366 |  |  |
| **Triglyceride**  **(mg/dl)** | Baseline(V2) | 155.87±89.22 | 146.80±97.63 | 0.6991 |  |
| 6 weeks(V3) | 125.30±50.01 | 152.60±105.35 | 0.1239 | 0.1239 |
| Change from baseline | -30.57±74.10 | 5.80±112.26 |  |  |
| P-value** | 0.0315 | 0.7617 |  |  |
| 12weeks(V4) | 128±56.00 | 155.63±98.43 | 0.0099 | 0.0064 |
| Change from baseline | -27.43±63.18 | 8.83±46.40 |  |  |
| P-value** | 0.0242 | 0.2682 |  |  |
| **HbA1c**  **(%)** | Baseline(V2) | 5.75±0.33 | 5.69±0.40 | 0.5680 |  |
| 6 weeks(V3) | 5.73±0.38 | 5.67±0.39 | 0.9286 | 0.8831 |
| Change from baseline | -0.02±0.15 | -0.02±0.15 |  |  |
| P-value** | 0.5562 | 0.4205 |  |  |
| 12weeks(V4) | 5.72±0.35 | 5.74±0.42 | 0.1632 | 0.1904 |
| Change from baseline | -0.02±0.19 | 0.04±0.19 |  |  |
| P-value** | 0.5118 | 0.1799 |  |  |
| **Insulin**  **(uIU/ml)** | Baseline(V2) | 17.51±28.22 | 18.13±18.46 | 0.9189 |  |
| 6 weeks(V3) | 10.24±5.43 | 14.16±13.40 | 0.5517 | 0.1163 |
| Change from baseline | -7.15±25.34 | -3.98±14.31 |  |  |
| P-value** | 0.1398 | 0.1093 |  |  |
| 12weeks(V4) | 11.96±9.19 | 13.22±13.28 | 0.9511 | 0.7535 |
| Change from baseline | -5.25±27.37 | -4.91±11.93 |  |  |
| P-value** | 0.3104 | 0.0202 |  |  |
| **C-peptide** | Baseline(V2) | 3.41±4.69 | 3.93±3.74 | 0.6214 |  |
| 6 weeks(V3) | 2.10±1.01 | 3.26±2.86 | 0.5021 | 0.0386 |
| Change from baseline | -1.31±4.42 | -0.67±2.95 |  |  |
| P-value** | 0.1148 | 0.1872 |  |  |
| 12weeks(V4) | 2.44±1.66 | 2.90±2.51 | 0.9484 | 0.4933 |
| Change from baseline | -0.97±4.61 | -1.03±2.24 |  |  |
| P-value** | 0.2566 | 0.0098 |  |  |
| **HOMA-IR** | Baseline(V2) | 1538.43  ± 2527.18 | 1572.30  ± 1556.29 | 0.9501 |  |
| 6 weeks(V3) | 873.46  ± 515.04 | 1232.28  ± 1335.32 | 0.5057 | 0.1425 |
| Change from baseline | -652.51  ± 2259.86 | -340.02  ± 1188.97 |  |  |
| P-value** |  |  |  |  |
| 12weeks(V4) | 1016.11  ± 892.03 | 1144.04  ± 1259.12 | 0.8926 | 0.7122 |
| Change from baseline | -495.15  ± 2495.13 | -428.26  ± 978.17 |  |  |
| P-value** | 0.2943 | 0.0140 |  |  |
| **HOMA-beta** | Baseline(V2) | 0.18± 0.28 | 0.19± 0.20 | 0.8862 |  |
| 6 weeks(V3) | 0.11± 0.05 | 0.15± 0.12 | 0.5943 | 0.0952 |
| Change from baseline | -0.07± 0.25 | -0.04± 0.16 |  |  |
| P-value** | 0.1513 | 0.1430 |  |  |
| 12weeks(V4) | 0.13± 0.09 | 0.14± 0.13 | 0.9745 | 0.8352 |
| Change from baseline | -0.05± 0.27 | -0.05± 0.13 |  |  |
| P-value** | 0.3447 | 0.0340 |  |  |
| **QUICKI** | Baseline(V2) | 0.14± 0.01 | 0.14± 0.01 | 0.4974 |  |
| 6 weeks(V3) | 0.15± 0.01 | 0.14± 0.01 | 0.6148 | 0.2432 |
| Change from baseline | 0.00± 0.01 | 0.00± 0.01 |  |  |
| P-value** | 0.0311 | 0.1795 |  |  |
| 12weeks(V5) | 0.15± 0.02 | 0.14± 0.01 | 0.9752 | 0.6706 |
| Change from baseline | 0.00± 0.01 | 0.00± 0.01 |  |  |
| P-value** | 0.1465 | 0.0420 |  |  |
| **Apoprotein- A1** | Baseline(V2) | 146.34± 16.98 | 140.59± 22.95 | 0.2616 |  |
| 6 weeks(V3) | 143.81± 17.75 | 142.78± 21.37 | 0.1627 | 0.2996 |
| Change from baseline | -2.54± 14.53 | 2.19± 12.47 |  |  |
| P-value** | 0.3469 | 0.3053 |  |  |
| 12weeks(V4) | 142.25± 16.35 | 140.61± 18.84 | 0.2706 | 0.5577 |
| Change from baseline | -4.10± 14.22 | 0.02± 15.45 |  |  |
| P-value** | 0.1255 | 0.9931 |  |  |
| **Apoprotein-B** | Baseline(V2) | 113.69± 19.22 | 112.97± 19.40 | 0.8811 |  |
| 6 weeks(V3) | 111.61± 16.95 | 114.17± 19.25 | 0.3831 | 0.3698 |
| Change from baseline | -2.09± 13.29 | 1.19± 16.34 |  |  |
| P-value** | 0.3968 | 0.6683 |  |  |
| 12weeks(V4) | 108.65± 17.56 | 112.69± 23.91 | 0.2629 | 0.2619 |
| Change from baseline | -5.04± 19.29 | -0.28± 14.64 |  |  |
| P-value** | 0.1630 | 0.9106 |  |  |
| **Atherogenic Index** | Baseline(V1) | 2.94± 0.72 | 3.13± 1.02 | 0.4000 |  |
| 6 weeks(V3) | 2.77± 0.72 | 2.94± 0.96 | 0.8595 | 0.9107 |
| Change from baseline | -0.17± 0.37 | -0.19± 0.51 |  |  |
| P-value** | 0.0147 | 0.0298 |  |  |
| 12weeks(V4) | 2.72± 0.68 | 3.04± 1.07 | 0.2604 | 0.1836 |
| Change from baseline | -0.22± 0.45 | -0.09± 0.50 |  |  |
| P-value** | 0.0110 | 0.2966 |  |  |
| **Body mass index** | Baseline(V1) | 25.23± 3.54 | 25.88± 3.91 | 0.4865 |  |
| 6 weeks(V3) | 25.35± 3.78 | 25.84± 4.11 | 0.2902 | 0.2012 |
| Change from baseline | 0.12± 0.58 | -0.04± 0.64 |  |  |
| P-value** |  |  |  |  |
| 12weeks(V5) | 25.30± 3.86 | 25.80± 3.87 | 0.3718 | 0.3458 |
| Change from baseline | 0.07± 0.65 | -0.08± 0.70 |  |  |
| P-value** | 0.5760 | 0.4800 |  |  |

*: Compared between groups; P-value by Two sample t–test

**: Compared within groups; P-value by Paired t-test

$: Compared between groups; P-value for ANCOVA adjusted baseline

Table3. Comparison of adverse events between the two groups (Safety set)

|  | **FRGP**  **N=41** | | **Placebo**  **N=42** | | **Total**  **N=83** | | **P-value** |
| --- | --- | --- | --- | --- | --- | --- | --- |
|  | **n(%)** | **Case** | **n(%)** | **Case** | **n(%)** | **Case** |
| **Adverse event** | 9 (21.95) | 11 | 10(23.81) | 15 | 19 (22.89) | 26 | 0.8403† |
| **Serious adverse event** | 0 (0.00) | 0 | 0 (0.00) | 0 | 0 (0.00) | 0 |  |
| **Abortion due to adverse event** | 1 (2.44) | 1 | 0 (0.00) | 0 | 1 (1.20) | 1 | 0.4940‡ |

†: P-value by Chi-square test

‡: P-value by Fisher’s exact test
